# Supplementary figures and images for: Identification of microbial volatile organic compounds (MVOCs) emitted from fungal isolates found on cinematographic film
Source: Royal Society of Chemistry journal article supplement (doi:10.1039/c2ay05826j), 2012-01-01

## ESI

ESI Figure 1

Chromatographs arising from 1-octen-3-ol (A), 3-octanone (B) and 3-octanol (B).

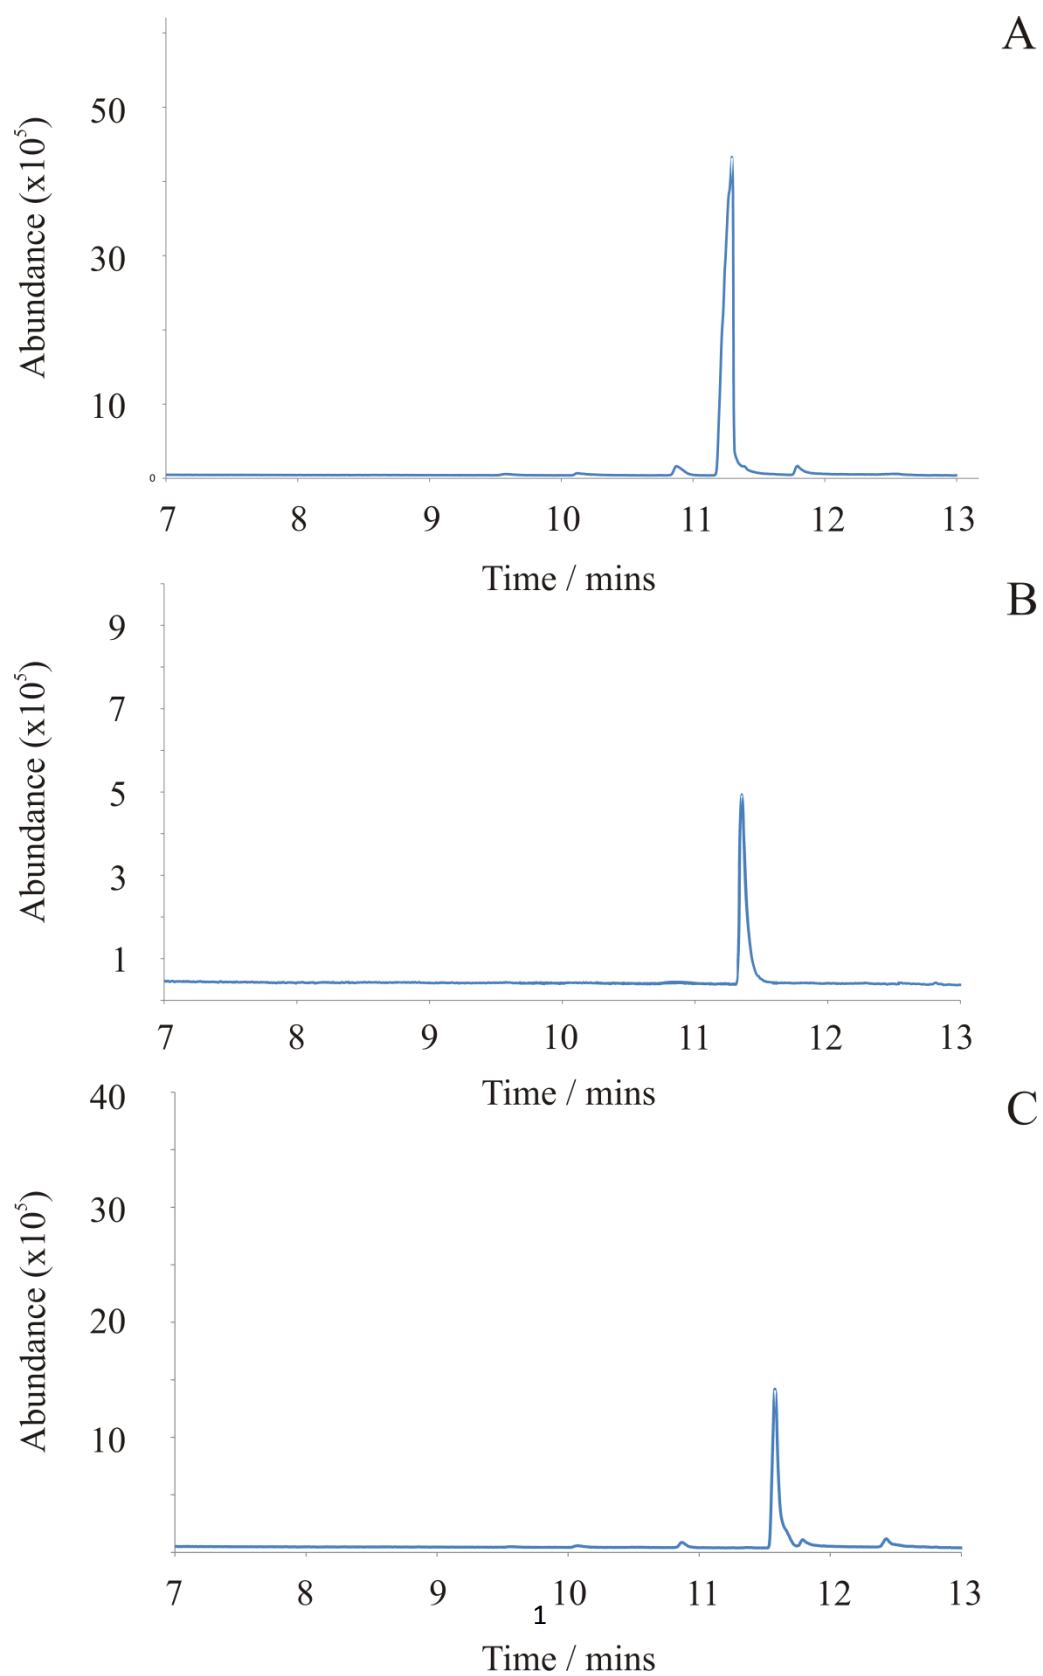

Supplement: c2ay05826j.pdf [file c2ay05826j.pdf]
